# Supplementary material for: An automated microfluidic system for efficient capture of rare cells and rapid flow-free stimulation
Source: Royal Society of Chemistry journal article supplement (doi:10.1039/d0lc00687d), 2020-01-01

## Chip Graphic User Interface Quick-Start

1. Open Hermes\_190709.m script

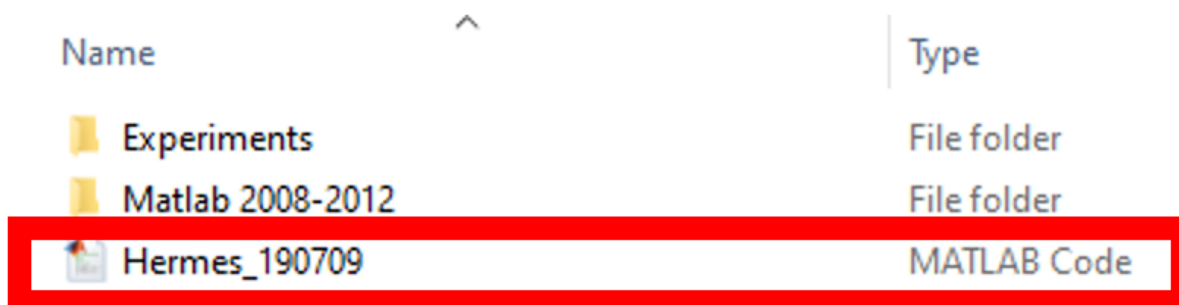

2. Run Hermes\_190709.m script.

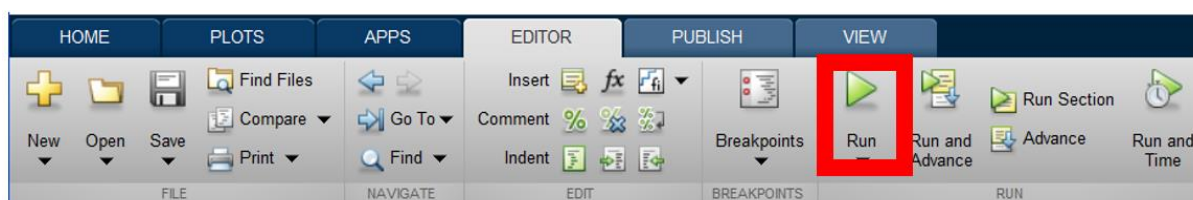

3. Enter your control box serial numbers.

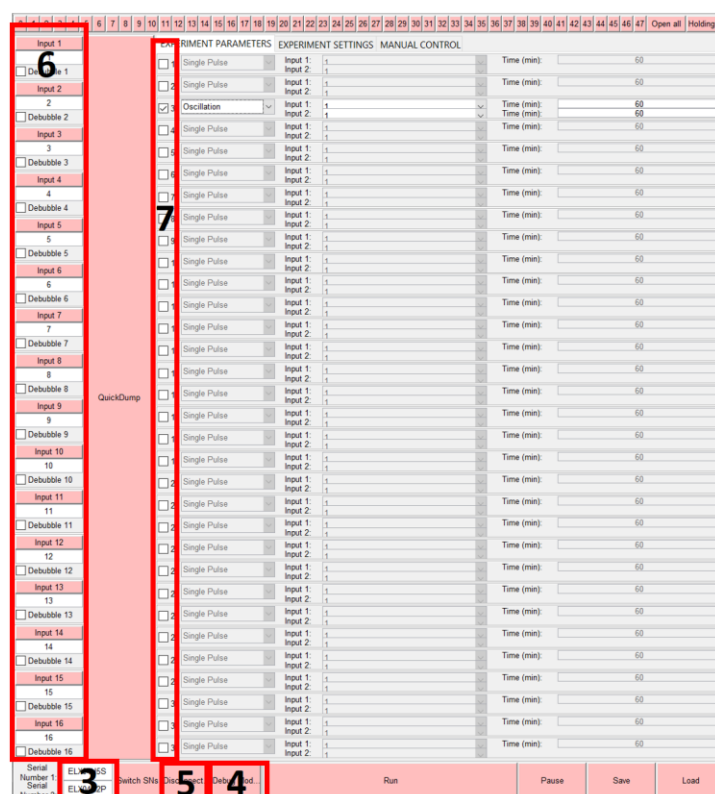

4. Disable "Debug Mode."
5. Connect to your box.
6. Enter media names in the corresponding media input text fields.
7. Enable your desired chambers.

8. Select experiment type for each chamber. Each chamber runs it's own distinct protocol.

|                                     |   |              |            |                |
|-------------------------------------|---|--------------|------------|----------------|
| <input checked="" type="checkbox"/> | 3 | Oscillation  | Input 1: 1 | Time (min): 60 |
|                                     |   |              | Input 2: 1 | Time (min): 60 |
| <input type="checkbox"/>            | 4 | Single Pulse | Input 1: 1 | Time (min): 60 |
|                                     |   |              | Input 2: 1 | Time (min): 60 |
| <input type="checkbox"/>            | 5 | Constant     | Input 1: 1 | Time (min): 60 |

- a. Single Pulse:

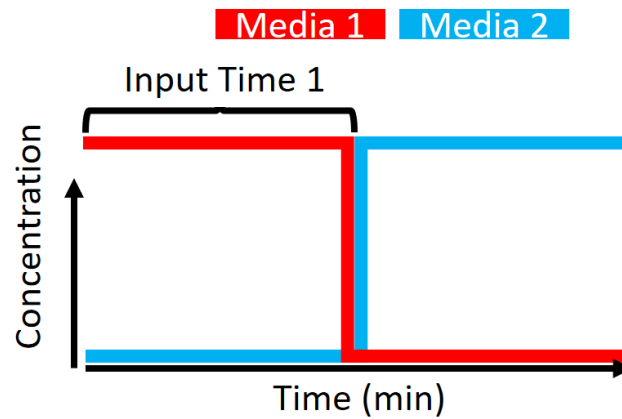

- b. Constant:

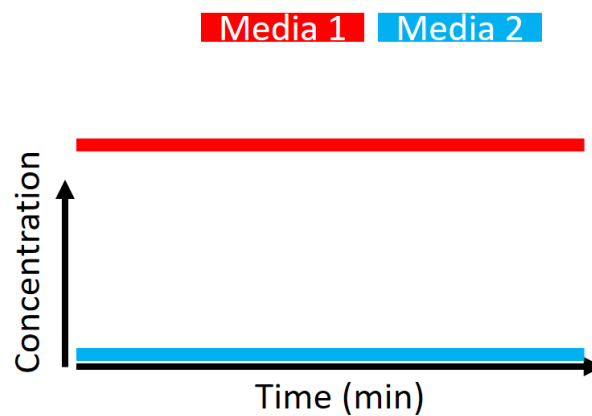

- c. Oscillation:

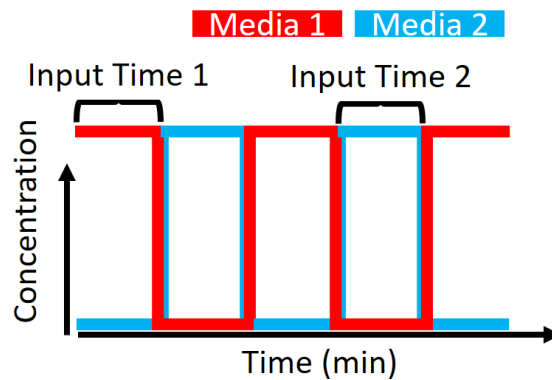

9. Select “Experimental Settings.”

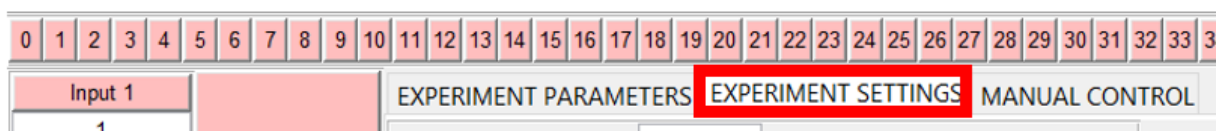

a. Default settings are sufficient for most experiments.\

10. Click “Run.”

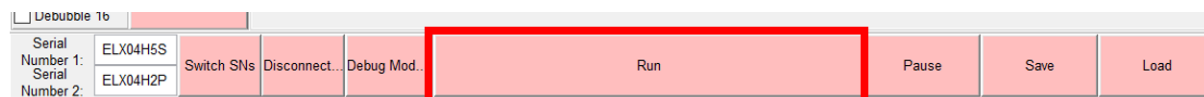

Supplement: d0lc00687d2.zip [file d0lc00687d2.zip]
